# Supplementary material for: A turn-on near-infrared fluorescence probe with aggregation-induced emission based on dibenzo[a,c]phenazine for detection of superoxide anions and its application in cell imaging
Source: Royal Society of Chemistry journal article supplement (doi:10.1039/c7an01860f), 2018-01-01
Supplement: c7an01860f1.pdf [file c7an01860f1.pdf]

## ***Electronic Supplementary Information (ESI)***

### **Turn-on near-infrared fluorescence probe with aggregation-induced emission based on dibenzo[*a,c*]phenazine for detection of superoxide anions and its application in cell imaging**

Ji Yang<sup>a</sup>, Xianglong Liu<sup>a</sup>, Honglei Wang<sup>b</sup>, Haoqi Tan<sup>b</sup>, Xiaoxu Xie<sup>a</sup>, Xiao Zhang<sup>a</sup>, Chenchen Liu<sup>a</sup>, Xue Qu<sup>b</sup> and Jianli Hua<sup>\*a</sup>

<sup>a</sup>*Key Laboratory for Advanced Materials, Institute of Fine Chemicals, College of Chemistry and Molecular Engineering, East China University of Science and Technology, 130 Meilong Road, Shanghai, 200237, China. E-mail: jlhua@ecust.edu.cn; Fax: +86-21-64250940; Tel: +86-21-64250940*

<sup>b</sup>*The State Key Laboratory of Bioreactor Engineering and Key Laboratory for Ultrafine Materials of Ministry of Education, East China University of Science and Technology Shanghai. 200237, China.*

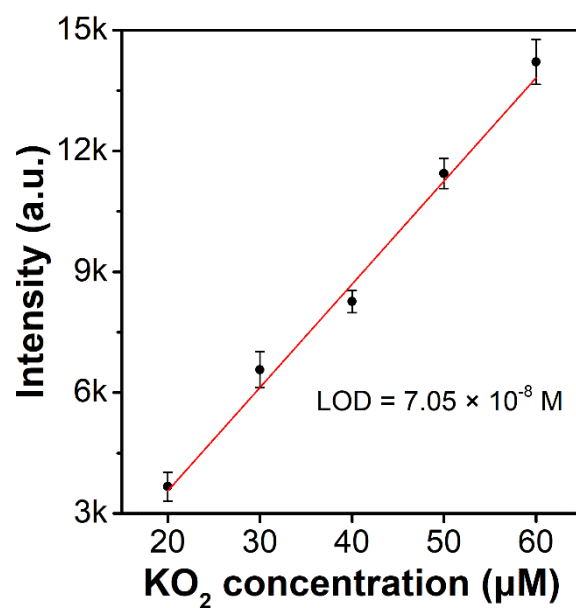

Fig. S1 The linear relationship of BDP (20  $\mu\text{M}$ ) for concentrations of superoxide anions from 20 to 60  $\mu\text{M}$ . Excitation wavelength: 500 nm.

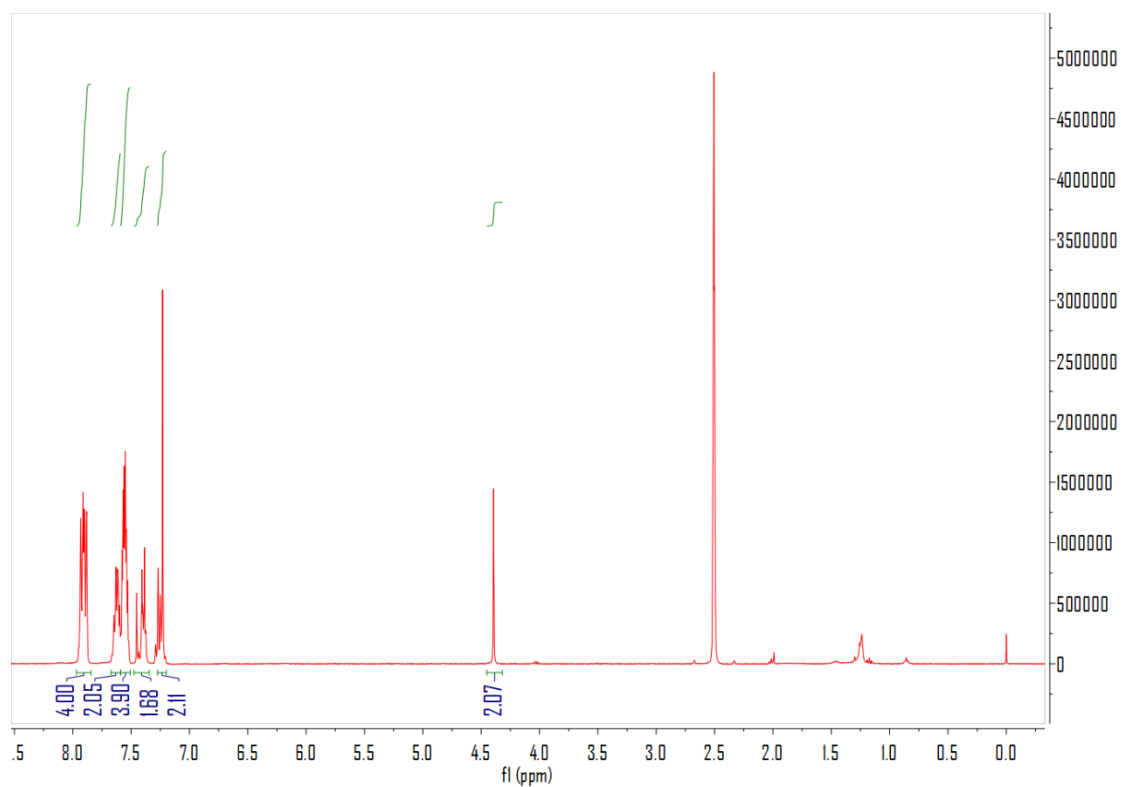

Fig. S2  $^1\text{H}$  NMR of compound 2.

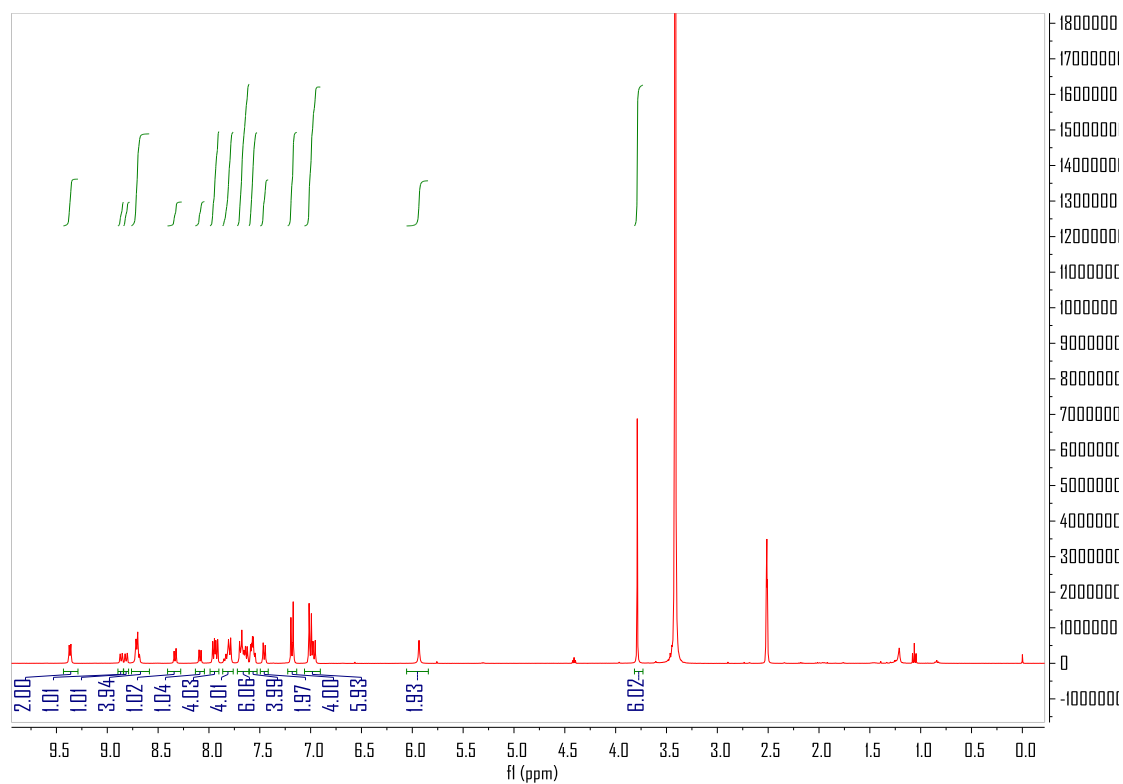

Fig. S3 <sup>1</sup>H NMR of **BDP**.

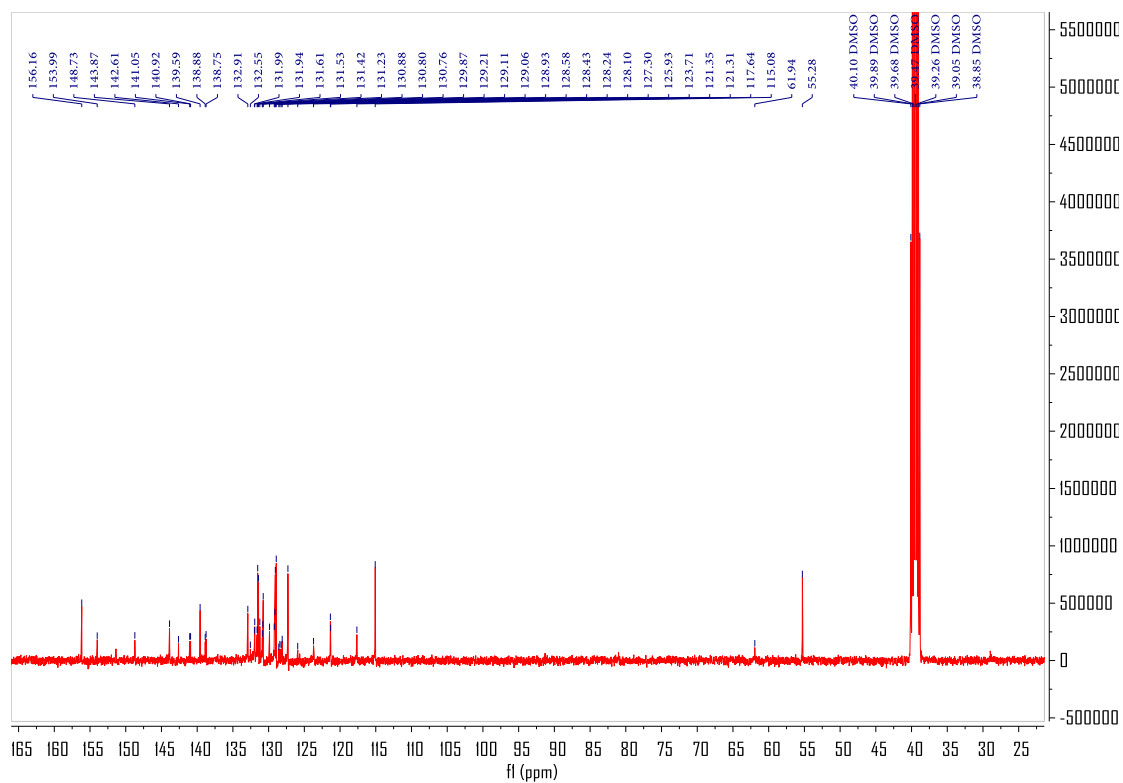

Fig. S4 <sup>13</sup>C NMR of **BDP**.

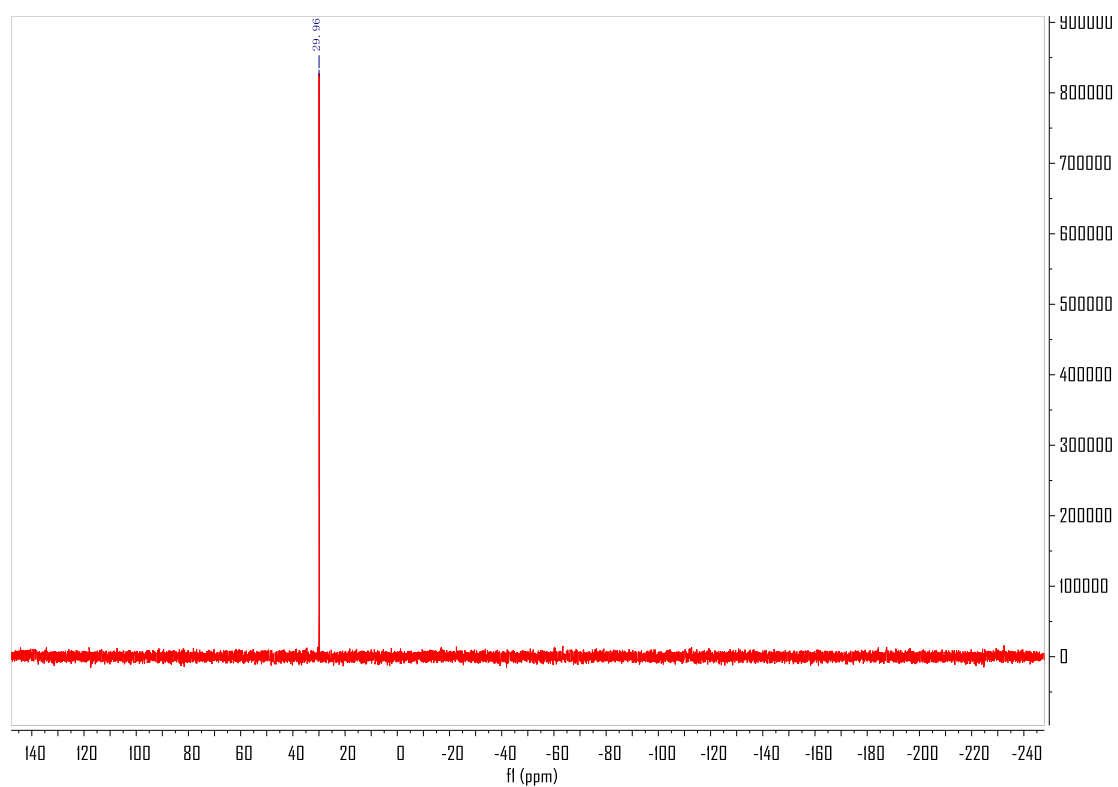

Fig. S5  $^{35}\text{P}$  of **BDP**.

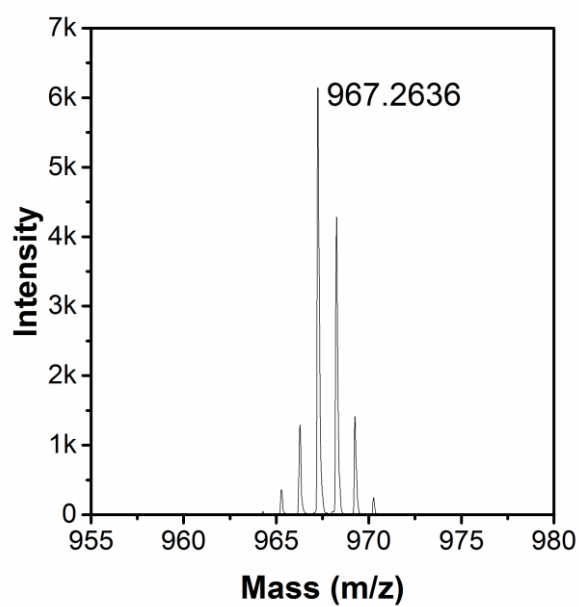

Fig. S6 MALDI-TOF mass spectrum of compound **BDP**.
